# Supplementary material
Source: Springer Nature journal article supplement (https://www.springermedizin.de/resource/supplementary/12872_2014_859_MOESM6_ESM.pdf/9430694)

Figure 4

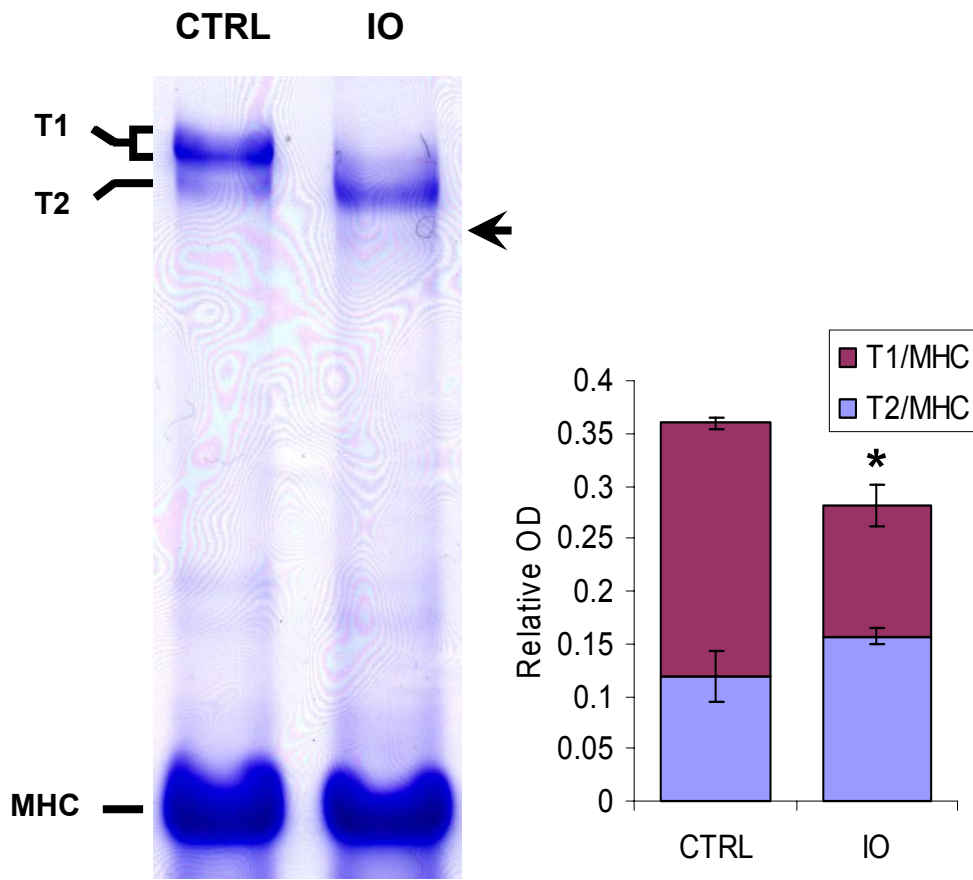

Supplement: MOESM6 [file 9430694]
